# Supplementary material for: Functional Prediction of Microbial Communities in Sediment Microbial Fuel Cells
Source: MDPI journal article supplement (doi:10.3390/bioengineering10020199), 2023-02-03
Supplement: s1 [file s1]

**Table S4.** The taxonomy assignment of the functional features related to energy metabolism predicted by FAPROTAX

| Functional features            | Bacteria                                                                                                                                                                                                                                                                                                                                                                                                                                                                                                                                                                                                                                                                                                                                                                                                                                                                                                                                                                                                                                                                                                                                                                                               |
|--------------------------------|--------------------------------------------------------------------------------------------------------------------------------------------------------------------------------------------------------------------------------------------------------------------------------------------------------------------------------------------------------------------------------------------------------------------------------------------------------------------------------------------------------------------------------------------------------------------------------------------------------------------------------------------------------------------------------------------------------------------------------------------------------------------------------------------------------------------------------------------------------------------------------------------------------------------------------------------------------------------------------------------------------------------------------------------------------------------------------------------------------------------------------------------------------------------------------------------------------|
| nitrate_reduction (38 records) | <i>g__Bilophila</i> ;__<br><i>g__Desulfovibrio</i> ;s__ <i>Desulfovibrio_oxamicus</i><br><i>s__Geobacter_argillaceus</i><br><i>s__Bacillus_funiculus</i><br><i>g__Anaerostipes</i> ;__<br><i>g__Veillonella</i> ;__<br><i>s__Eliaera_tepidiphila</i><br><i>s__Pedomicrobium_americanum</i><br><i>g__Ensifer</i> ;__<br><i>g__Rhodoplanes</i> ;__<br><i>g__Gemmobacter</i> ;__<br><i>g__Paracoccus</i> ;__<br><i>g__Magnetospirillum</i> ;__<br><i>g__Aeromonas</i> ;__<br><i>g__Shewanella</i> ;__<br><i>s__Shewanella_baltica</i><br><i>g__Achromobacter</i> ;__<br><i>g__Cupriavidus</i> ;__<br><i>s__Cupriavidus_oxalaticus</i><br><i>g__Aquabacterium</i> ;__<br><i>g__Ideonella</i> ;__<br><i>g__Azoarcus</i> ;__<br><i>s__Azoarcus_tolulyticus</i><br><i>g__Azospira</i> ;__<br><i>g__Azospira</i> ;s__ <i>uncultured_Rhodocyclaceae</i><br><i>g__Dechloromonas</i> ;__<br><i>g__Thauera</i> ;__<br><i>g__Zoogloea</i> ;__<br><i>g__Sutterella</i> ;__<br><i>g__Sutterella</i> ;s__ <i>gut_metagenome</i><br><i>s__Sutterella_wadsworthensis</i><br><i>g__Sutterella</i> ;s__ <i>uncultured_bacterium</i><br><i>g__Enterobacter</i> ;__<br><i>g__Klebsiella</i> ;__<br><i>g__Haemophilus</i> ;__ |

|                           |                                                  |    |
|---------------------------|--------------------------------------------------|----|
|                           | <i>g__Vibrio</i> ;                               | __ |
|                           | <i>g__Stenotrophomonas</i> ;                     | __ |
|                           | <i>g__Opitutus</i> ;                             | __ |
| nitrate_respiration (19)  | <i>g__Bilophila</i> ;                            | __ |
|                           | <i>s__Desulfovibrio_oxamicus</i>                 |    |
|                           | <i>s__Geobacter_argillaceus</i>                  |    |
|                           | <i>g__Rhodoplanes</i> ;                          | __ |
|                           | <i>g__Gemmobacter</i> ;                          | __ |
|                           | <i>g__Paracoccus</i> ;                           | __ |
|                           | <i>g__Magnetospirillum</i> ;                     | __ |
|                           | <i>g__Shewanella</i> ;                           | __ |
|                           | <i>s__Shewanella_baltica</i>                     |    |
|                           | <i>g__Achromobacter</i> ;                        | __ |
|                           | <i>g__Aquabacterium</i> ;                        | __ |
|                           | <i>g__Azoarcus</i> ;                             | __ |
|                           | <i>s__Azoarcus_tolulyticus</i>                   |    |
|                           | <i>g__Azospira</i> ;                             | __ |
|                           | <i>g__Azospira</i> ;s__uncultured_Rhodocyclaceae |    |
|                           | <i>g__Dechloromonas</i> ;                        | __ |
|                           | <i>g__Thauera</i> ;                              | __ |
|                           | <i>g__Zoogloea</i> ;                             | __ |
|                           | <i>g__Stenotrophomonas</i> ;                     | __ |
| nitrogen_respiration (20) | <i>g__Bilophila</i> ;                            | __ |
|                           | <i>s__Desulfovibrio_oxamicus</i>                 |    |
|                           | <i>s__Geobacter_argillaceus</i>                  |    |
|                           | <i>s__anammox_bacterium</i>                      |    |
|                           | <i>g__Rhodoplanes</i> ;                          | __ |
|                           | <i>g__Gemmobacter</i> ;                          | __ |
|                           | <i>g__Paracoccus</i> ;                           | __ |
|                           | <i>g__Magnetospirillum</i> ;                     | __ |
|                           | <i>g__Shewanella</i> ;                           | __ |
|                           | <i>s__Shewanella_baltica</i>                     |    |
|                           | <i>g__Achromobacter</i> ;                        | __ |
|                           | <i>g__Aquabacterium</i> ;                        | __ |
|                           | <i>g__Azoarcus</i> ;                             | __ |
|                           | <i>s__Azoarcus_tolulyticus</i>                   |    |
|                           | <i>g__Azospira</i> ;                             | __ |
|                           | <i>g__Azospira</i> ;s__uncultured_Rhodocyclaceae |    |

|                                              |                                                             |
|----------------------------------------------|-------------------------------------------------------------|
|                                              | <i>g__Dechloromonas</i> ;                                   |
|                                              | <i>g__Thauera</i> ;                                         |
|                                              | <i>g__Zoogloea</i> ;                                        |
|                                              | <i>g__Stenotrophomonas</i> ;                                |
| ureolysis (12)                               | <i>s__Bacillus_funiculus</i>                                |
|                                              | <i>g__Roseomonas</i> ;                                      |
|                                              | <i>s__Roseomonas_lacus</i>                                  |
|                                              | <i>s__Roseomonas_rubra</i>                                  |
|                                              | <i>g__Azospirillum</i> ;                                    |
|                                              | <i>s__Azospirillum_sp.</i>                                  |
|                                              | <i>g__Mesorhizobium</i> ;                                   |
|                                              | <i>s__Zavarzinia_compransoris</i>                           |
|                                              | <i>g__Methylophilus</i> ;                                   |
|                                              | <i>s__Nitrosomonas_nitrosa</i>                              |
|                                              | <i>g__Herbaspirillum</i> ;                                  |
|                                              | <i>g__Azotobacter</i> ;                                     |
| sulfite_respiration (2)                      | <i>g__Desulfobulbus</i> ;                                   |
|                                              | <i>s__uncultured_Desulfobulbus</i>                          |
| methanogenesis_by_CO2_reduction_with_H2 (13) | <i>g__Methanobacterium</i>                                  |
|                                              | <i>g__Methanobacterium</i> ; <i>s__uncultured_bacterium</i> |
|                                              | <i>o__Methanomicrobiales</i> ; ; ;                          |
|                                              | <i>s__uncultured_Methanomicrobiales</i>                     |
|                                              | <i>g__Methanolinea</i> ;                                    |
|                                              | <i>g__Methanolinea</i> ; <i>s__uncultured_archaeon</i>      |
|                                              | <i>s__uncultured_Methanomicrobiales</i>                     |
|                                              | <i>g__Methanoregula</i> ;                                   |
|                                              | <i>g__Methanoregula</i> ; <i>s__uncultured_methanogenic</i> |
|                                              | <i>g__Methanospirillum</i> ;                                |
|                                              | <i>s__Methanospirillum_psychrodurum</i>                     |
|                                              | <i>g__Methanospirillum</i> ; <i>s__uncultured_archaeon</i>  |
|                                              | <i>g__Methanosarcina</i> ;                                  |
