# Supplementary material for: Functional Prediction of Microbial Communities in Sediment Microbial Fuel Cells
Source: MDPI journal article supplement (doi:10.3390/bioengineering10020199), 2023-02-03
Supplement: s1 [file s1]

**Table S1.** Shannon diversity index of soil microbial community.

| Samples | Shannon |
|---------|---------|
| D1      | 9.922   |
| D2      | 8.445   |
| D3      | 8.285   |
| D4      | 9.883   |
| D5      | 9.411   |
| S1      | 9.215   |
| S2      | 9.952   |
| S3      | 10.237  |
| S4      | 10.328  |
| S5      | 9.836   |
| D       | 10.991  |
| DA      | 9.447   |
| RF      | 11.021  |
| RFA     | 8.57    |
| Nr1     | 11.235  |
| Nr2     | 11.248  |
| Nr3     | 10.901  |
