# Supplementary material for: Functional Prediction of Microbial Communities in Sediment Microbial Fuel Cells
Source: MDPI journal article supplement (doi:10.3390/bioengineering10020199), 2023-02-03
Supplement: s1 [file s1]

**Table S3.** The functional features and the metabolic categories

| Functional features                                                              | Metabolic pathways                    |
|----------------------------------------------------------------------------------|---------------------------------------|
| <b>BugBase</b>                                                                   |                                       |
| M00019_Valine_isoleucine_biosynthesis_pyruvate_valine_2_oxobutanoate_isoleucine_ | Amino acid metabolism                 |
| M00024_Phenylalanine_biosynthesis_chorismate_phenylalanine_                      | Amino acid metabolism                 |
| M00033_Ectoine_biosynthesis_                                                     | Amino acid metabolism                 |
| M00037_Melatonin_biosynthesis_tryptophan_serotonin_melatonin_                    | Amino acid metabolism                 |
| M00040_Tyrosine_biosynthesis_prephanate_pretyrosine_tyrosine_                    | Amino acid metabolism                 |
| M00042_Catecholamine_biosynthesis_tyrosine_dopamine_noradrenaline_adrenaline_    | Amino acid metabolism                 |
| M00047_Creatine_pathway_                                                         | Amino acid metabolism                 |
| M00526_Lysine_biosynthesis_DAP_dehydrogenase_pathway_aspartate_lysin_            | Amino acid metabolism                 |
| M00096_C5_isoprenoid_biosynthesis_non_mevalonate_pathway_                        | Biosynthesis of secondary metabolites |
| M00549_Nucleotide_sugar_biosynthesis_glucose_UDP_glucose_                        | Carbohydrate metabolism               |
| M00162_Cytochrome_b6f_complex_                                                   | Energy metabolism                     |
| M00170_C4_dicarboxylic_acid_cycle_phosphoenolpyruvate_carboxykinase_type_        | Energy metabolism                     |
| M00172_C4_dicarboxylic_acid_cycle_NADP_malic_enzyme_type_                        | Energy metabolism                     |
| M00347_Methanogenesis_formate_methane_                                           | Energy metabolism                     |
| M00356_Methanogenesis_methanol_methane_                                          | Energy metabolism                     |
| M00561_Methanogenesis_trimethylamine_methane_                                    | Energy metabolism                     |
| M00562_Methanogenesis_dimethylamine_methane_                                     | Energy metabolism                     |
| M00563_Methanogenesis_methylamine_methane_                                       | Energy metabolism                     |
| M00567_Methanogenesis_CO2_methane_                                               | Energy metabolism                     |

|                                                                                    |                                                           |
|------------------------------------------------------------------------------------|-----------------------------------------------------------|
| M00186_Tungstate_transport_system_                                                 | Environmental Information Processing; Membrane transport  |
| M00192_Putative_thiamine_transport_system_                                         | Environmental Information Processing; Membrane transport  |
| M00202_Oligogalacturonide_transport_system_                                        | Environmental Information Processing; Membrane transport  |
| M00213_L_Arabinose_transport_system_                                               | Environmental Information Processing; Membrane transport  |
| M00215_D_Xylose_transport_system_                                                  | Environmental Information Processing; Membrane transport  |
| M00217_D_Allose_transport_system_                                                  | Environmental Information Processing; Membrane transport  |
| M00225_Lysine_arginine_ornithine_transport_system_                                 | Environmental Information Processing; Membrane transport  |
| M00226_Histidine_transport_system_                                                 | Environmental Information Processing; Membrane transport  |
| M00229_Arginine_transport_system_                                                  | Environmental Information Processing; Membrane transport  |
| M00230_Glutamate_aspartate_transport_system_                                       | Environmental Information Processing; Membrane transport  |
| M00241_Vitamin_B12_transport_system_                                               | Environmental Information Processing; Membrane transport  |
| M00252_Lipooligosaccharide_transport_system_                                       | Environmental Information Processing; Membrane transport  |
| M00283_PTS_system_ascorbate_specific_II_component_                                 | Environmental Information Processing; Membrane transport  |
| M00306_PTS_system_fructose_specific_II_like_component_                             | Environmental Information Processing; Membrane transport  |
| M00317_Manganese_iron_transport_system_                                            | Environmental Information Processing; Membrane transport  |
| M00324_Dipeptide_transport_system_                                                 | Environmental Information Processing; Membrane transport  |
| M00335_Sec_secretion_system_                                                       | Environmental Information Processing; Membrane transport  |
| M00429_Competence_related_DNA_transformation_transporter_                          | Environmental Information Processing; Membrane transport  |
| M00446_RstB_RstA_two_component_regulatory_system_                                  | Environmental Information Processing; Signal transduction |
| M00448_CssS_CssR_secretion_stress_response_two_component_regulatory_system_        | Environmental Information Processing; Signal transduction |
| M00449_CreC_CreB_phosphate_regulation_two_component_regulatory_system_             | Environmental Information Processing; Signal transduction |
| M00451_BasS_BasR_antimicrobial_peptide_resistance_two_component_regulatory_system_ | Environmental Information Processing; Signal transduction |
| M00453_QseC_QseB_quorum_sensing_two_component_regulatory_system_                   | Environmental Information Processing; Signal transduction |

|                                                                                           |                                                                           |
|-------------------------------------------------------------------------------------------|---------------------------------------------------------------------------|
| M00456_ArcB_ArcA_anoxic_redox_control_two_component_regulatory_system_                    | Environmental Information Processing; Signal transduction                 |
| M00475_BarA_UvrY_central_carbon_metabolism_two_component_regulatory_system_               | Environmental Information Processing; Signal transduction                 |
| M00476_ComP_ComA_competence_two_component_regulatory_system_                              | Environmental Information Processing; Signal transduction                 |
| M00479_DesK_DesR_membrane_lipid_fluidity_regulation_two_component_regulatory_system_      | Environmental Information Processing; Signal transduction                 |
| M00483_NreB_NreC_dissimilatory_nitrate_nitrite_reduction_two_component_regulatory_system_ | Environmental Information Processing; Signal transduction                 |
| M00484_YdfH_YdfI_two_component_regulatory_system_                                         | Environmental Information Processing; Signal transduction                 |
| M00486_CitA_CitB_citrate_fermentation_two_component_regulatory_system_                    | Environmental Information Processing; Signal transduction                 |
| M00488_DcuS_DcuR_aerobic_C4_dicarboxylate_metabolism_two_component_regulatory_system_     | Environmental Information Processing; Signal transduction                 |
| M00498_NtrY_NtrX_nitrogen_regulation_two_component_regulatory_system_                     | Environmental Information Processing; Signal transduction                 |
| M00506_CheA_CheYBV_chemotaxis_two_component_regulatory_system_                            | Environmental Information Processing; Signal transduction                 |
| M00511_PleC_PleD_cell_fate_control_two_component_regulatory_system_                       | Environmental Information Processing; Signal transduction                 |
| M00513_LuxQN_CqsS_LuxU_LuxO_quorum_sensing_two_component_regulatory_system_               | Environmental Information Processing; Signal transduction                 |
| M00515_FlrB_FlrC_polar_flagellar_synthesis_two_component_regulatory_system_               | Environmental Information Processing; Signal transduction                 |
| M00342_Bacterial_proteasome_                                                              | Genetic Information Processing                                            |
| M00343_Archaeal_proteasome_                                                               | Genetic Information Processing                                            |
| M00360_Aminoacyl_tRNA_biosynthesis_prokaryotes_                                           | Genetic Information Processing                                            |
| M00060_Lipopolysaccharide_biosynthesis_KDO2_lipid_A_                                      | Glycan metabolism, Lipopolysaccharide metabolism, carbohydrate metabolism |
| M00107_Steroid_hormone_biosynthesis_cholesterol_prognenolone_progesterone_                | Lipid metabolism                                                          |
| M00110_C19_C18_Steroid_hormone_biosynthesis_pregnenolone_androstenedione_estrone_         | Lipid metabolism                                                          |
| M00361_Nucleotide_sugar_biosynthesis_eukaryotes_                                          | Carbohydrate metabolism                                                   |
| M00124_Pyridoxal_biosynthesis_erythrose_4P_pyridoxal_5P_                                  | Metabolism of cofactors and vitamins                                      |
| M00126_Tetrahydrofolate_biosynthesis_GTP_THF_                                             | Metabolism of cofactors and vitamins                                      |

|                                                               |                                                 |
|---------------------------------------------------------------|-------------------------------------------------|
| M00048_Inosine_monophosphate_biosynthesis_PRPP_glutamine_IMP_ | Nucleotide metabolism                           |
| M00313_indolepyruvate_ferredoxin_oxidoreductase               | phenylalanine metabolism, tryptophan metabolism |
| M00418_Toluene_degradation_anaerobic_toluene_benzoyl_CoA_     | Xenobiotics biodegradation                      |

---

### FAPROTAX

---

|                                         |                               |
|-----------------------------------------|-------------------------------|
| aromatic_compound_degradation           | Aromatic Compound Degradation |
| intracellular_parasites                 | Infectious disease            |
| methanogenesis_by_CO2_reduction_with_H2 | Energy metabolism             |
| nitrate_reduction                       | Energy metabolism             |
| nitrate_respiration                     | Energy metabolism             |
| nitrogen_respiration                    | Energy metabolism             |
| predatory_or_exoparasitic               | Infectious disease            |
| sulfite_respiration                     | Energy metabolism             |
| ureolysis                               | Energy metabolism             |

---

### PICRUSt2

---

|                                                   |                               |
|---------------------------------------------------|-------------------------------|
| L-isoleucine biosynthesis I (from threonine)      | Amino Acid Biosynthesis       |
| L-lysine biosynthesis V                           | Amino Acid Biosynthesis       |
| L-isoleucine biosynthesis II                      | Amino Acid Biosynthesis       |
| L-isoleucine biosynthesis IV                      | Amino Acid Biosynthesis       |
| superpathway of L-alanine biosynthesis            | Amino Acid Biosynthesis       |
| L-valine biosynthesis                             | Amino Acid Biosynthesis       |
| catechol degradation to &beta;-ketoadipate        | Aromatic Compound Degradation |
| catechol degradation III (ortho-cleavage pathway) | Aromatic Compound Degradation |

aromatic compounds degradation via  $\beta$ -ketoadipate  
 superpathway of chorismate metabolism  
 starch biosynthesis  
 UDP-2,3-diacetamido-2,3-dideoxy- $\alpha$ -D-mannuronate biosynthesis  
 superpathway of UDP-N-acetylglucosamine-derived O-antigen building blocks biosynthesis  
 sucrose degradation IV (sucrose phosphorylase)  
 glycogen degradation II (eukaryotic)  
 D-galacturonate degradation II  
 D-galactarate degradation I  
 superpathway of D-glucarate and D-galactarate degradation  
 2-methylcitrate cycle II  
 superpathway of tetrahydrofolate biosynthesis and salvage  
 superpathway of menaquinol-9 biosynthesis  
 superpathway of menaquinol-6 biosynthesis I  
 superpathway of demethylmenaquinol-6 biosynthesis I  
 superpathway of demethylmenaquinol-9 biosynthesis  
 superpathway of menaquinol-10 biosynthesis  
 superpathway of heme biosynthesis from glycine  
 superpathway of tetrahydrofolate biosynthesis  
 pyridoxal 5'-phosphate biosynthesis I  
 superpathway of fatty acid biosynthesis initiation (E. coli)  
 archaetidylserine and archaetidylethanolamine biosynthesis  
 superpathway of glycolysis, pyruvate dehydrogenase, TCA, and glyoxylate bypass

Aromatic Compound Degradation  
 Biosynthesis of the Aromatic Amino Acids  
 Carbohydrate Biosynthesis  
 Carbohydrate Biosynthesis  
 Carbohydrate Biosynthesis  
 Carbohydrate Degradation  
 Carbohydrate Degradation  
 Carbohydrate Degradation  
 Carboxylate Degradation  
 Carboxylate Degradation  
 Carboxylate Degradation  
 Cofactor, Carrier, and Vitamin Biosynthesis  
 Fatty Acid and Lipid Biosynthesis  
 Fatty Acid and Lipid Biosynthesis  
 Generation of Precursor Metabolites and Energy

|                                                          |                                                |
|----------------------------------------------------------|------------------------------------------------|
| Bifidobacterium shunt                                    | Generation of Precursor Metabolites and Energy |
| nitrifier denitrification                                | Generation of Precursor Metabolites and Energy |
| superpathway of glyoxylate bypass and TCA                | Generation of Precursor Metabolites and Energy |
| pyrimidine deoxyribonucleotides de novo biosynthesis III | Nucleoside and Nucleotide Biosynthesis         |
| enterobactin biosynthesis                                | Secondary Metabolite Biosynthesis              |
| isoprene biosynthesis II (engineered)                    | Secondary Metabolite Biosynthesis              |

---

### Tax4Fun2

---

|                                     |                                                           |
|-------------------------------------|-----------------------------------------------------------|
| Regulation of actin cytoskeleton    | Cellular Processes                                        |
| Oocyte meiosis                      | Cellular Processes                                        |
| Cellular senescence                 | Cellular Processes                                        |
| Meiosis - yeast                     | Cellular Processes                                        |
| Focal adhesion                      | Cellular Processes                                        |
| Hippo signaling pathway             | Environmental Information Processing, Signal transduction |
| Wnt signaling pathway               | Environmental Information Processing, Signal transduction |
| Ras signaling pathway               | Environmental Information Processing, Signal transduction |
| AMPK signaling pathway              | Environmental Information Processing, Signal transduction |
| Sphingolipid signaling pathway      | Environmental Information Processing, Signal transduction |
| cAMP signaling pathway              | Environmental Information Processing, Signal transduction |
| Chronic myeloid leukemia            | Human Diseases                                            |
| Amyotrophic lateral sclerosis (ALS) | Human Diseases                                            |
| Salmonella infection                | Human Diseases, Infectious disease                        |
| Shigellosis                         | Human Diseases, Infectious disease                        |
| Biotin metabolism                   | Metabolism of cofactors and vitamins                      |

|                                                  |                                                         |
|--------------------------------------------------|---------------------------------------------------------|
| Glycosaminoglycan degradation                    | Metabolism, Glycan biosynthesis and metabolism          |
| Fatty acid biosynthesis                          | Metabolism, Lipid                                       |
| Glycerophospholipid metabolism                   | Metabolism, Lipid                                       |
| Indole alkaloid biosynthesis                     | Metabolism, Biosynthesis of other secondary metabolites |
| Methane metabolism                               | Metabolism, Energy                                      |
| Steroid degradation                              | Metabolism, Xenobiotics biodegradation and metabolism   |
| Isoquinoline alkaloid biosynthesis               | Metabolism, Biosynthesis of other secondary metabolites |
| Furfural degradation                             | Metabolism, Xenobiotics biodegradation and metabolism   |
| Long-term potentiation                           | Organismal Systems                                      |
| Vascular smooth muscle contraction               | Organismal Systems                                      |
| Inflammatory mediator regulation of TRP channels | Organismal Systems                                      |
| Synaptic vesicle cycle                           | Organismal Systems                                      |
| Platelet activation                              | Organismal Systems                                      |
| Protein digestion and absorption                 | Organismal Systems                                      |
| GnRH signaling pathway                           | Organismal Systems                                      |
| Fc gamma R-mediated phagocytosis                 | Organismal Systems                                      |
| Glucagon signaling pathway                       | Organismal Systems                                      |
| Carbohydrate digestion and absorption            | Organismal Systems                                      |
| Cholinergic synapse                              | Organismal Systems                                      |
| Renin secretion                                  | Organismal Systems                                      |
| Fc epsilon RI signaling pathway                  | Organismal Systems                                      |
| Longevity regulating pathway - multiple species  | Organismal Systems                                      |

---
