# Supplementary material for: Functional Prediction of Microbial Communities in Sediment Microbial Fuel Cells
Source: MDPI journal article supplement (doi:10.3390/bioengineering10020199), 2023-02-03
Supplement: s1 [file s1]

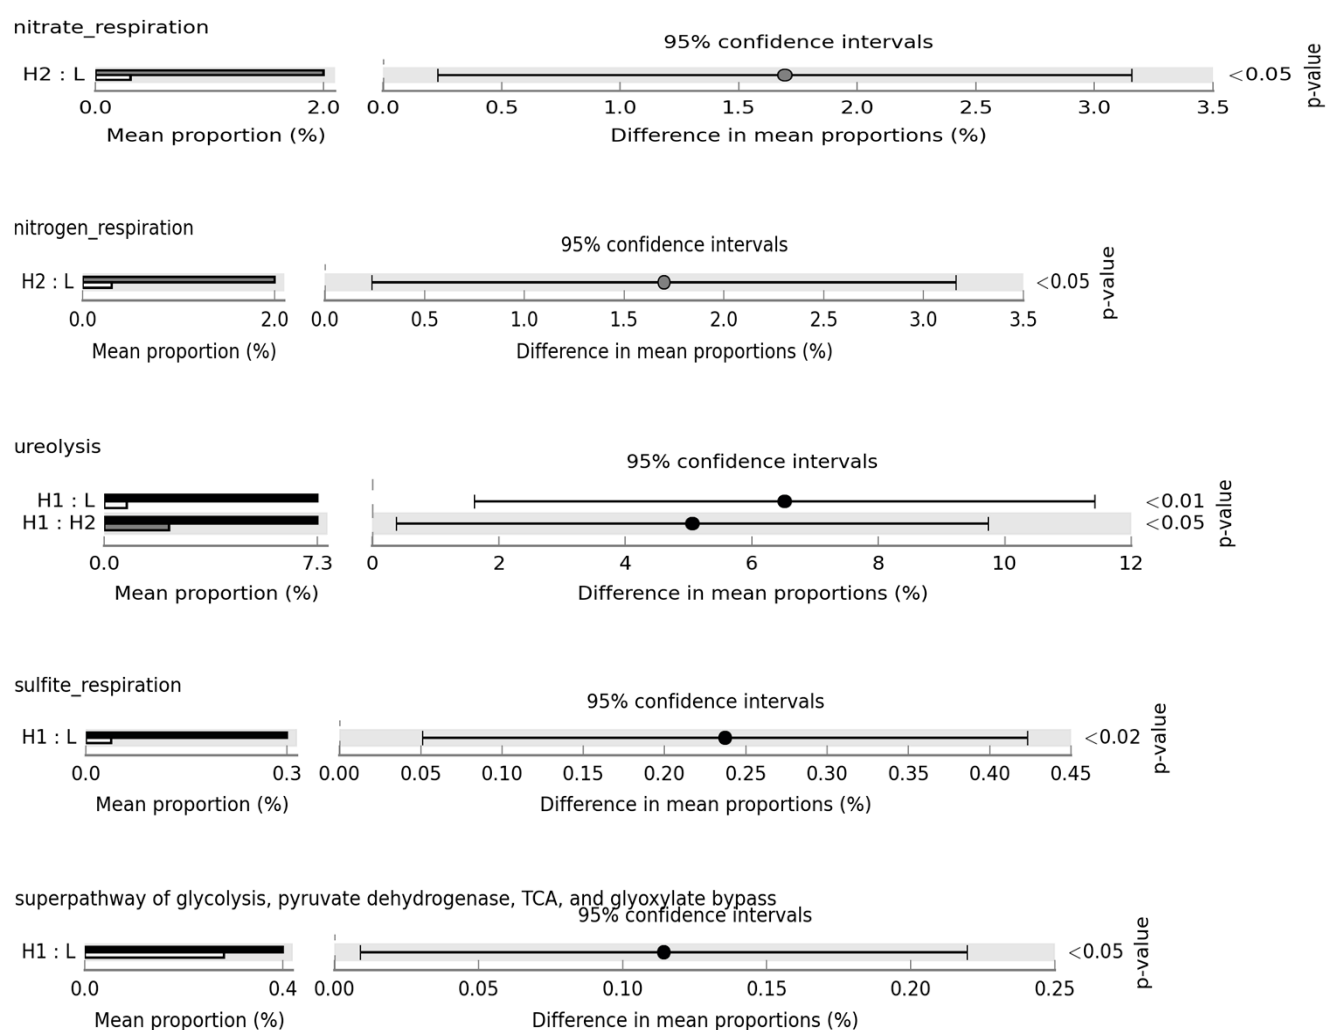

**Figure S3.** The significant post hoc assay by the Tukey–Kramer test for energy metabolism functional features.
