# Supplementary material for: Functional Prediction of Microbial Communities in Sediment Microbial Fuel Cells
Source: MDPI journal article supplement (doi:10.3390/bioengineering10020199), 2023-02-03
Supplement: s1 [file s1]

**Table S2.** Scores of the fraction of taxonomic units unused (FTU), the fraction of sequences unused (FSU), and the weighted NSTI

|     | Fraction of taxonomic<br>units unused (FTU)<br>(Tax4fun2 beta) | Fraction of sequences<br>unused (FSU)<br>(Tax4fun2 beta) | Weighted NSTI<br>(PICRUST2) |
|-----|----------------------------------------------------------------|----------------------------------------------------------|-----------------------------|
| D1  | 0.83049                                                        | 0.73743                                                  | 0.10529451                  |
| D2  | 0.86337                                                        | 0.8117                                                   | 0.126038929                 |
| D3  | 0.84386                                                        | 0.65774                                                  | 0.082688743                 |
| D4  | 0.86321                                                        | 0.7302                                                   | 0.120133158                 |
| D5  | 0.85119                                                        | 0.75681                                                  | 0.104860133                 |
| S1  | 0.88913                                                        | 0.89556                                                  | 0.125323108                 |
| S2  | 0.87988                                                        | 0.86613                                                  | 0.181964255                 |
| S3  | 0.86602                                                        | 0.80544                                                  | 0.140493329                 |
| S4  | 0.84657                                                        | 0.73201                                                  | 0.135622074                 |
| S5  | 0.85861                                                        | 0.79784                                                  | 0.129562562                 |
| D   | 0.69096                                                        | 0.61704                                                  | 0.213360924                 |
| DA  | 0.66936                                                        | 0.52232                                                  | 0.188606015                 |
| RF  | 0.73346                                                        | 0.72756                                                  | 0.224126516                 |
| RFA | 0.73227                                                        | 0.85596                                                  | 0.169761351                 |
| Nr1 | 0.94829                                                        | 0.95161                                                  | 0.515662881                 |
| Nr2 | 0.95033                                                        | 0.95579                                                  | 0.512702871                 |
| Nr3 | 0.91906                                                        | 0.90397                                                  | 0.404120219                 |
