# Supplementary material for: Functional Prediction of Microbial Communities in Sediment Microbial Fuel Cells
Source: Bioengineering (Basel). 2023 Feb 3;10(2):199. doi: 10.3390/bioengineering10020199 (PMC9951962; doi:10.3390/bioengineering10020199)
Supplement: Supplementary file 1 [file bioengineering-10-00199-s001.zip]

Archive with 8 entries (8 files):
- Fig s1 relative .pdf
- fig s2 .pdf
- FigS3_posthoc_energy_re.pdf
- FigS4_posthoc_cofactor.pdf
- Table s1 Shannon.pdf
- TableS2_NSTI_FSU.pdf
- TableS3_Function_features.pdf
- Table_S4.pdf
