# Supplementary figures and images for: Functional Prediction of Microbial Communities in Sediment Microbial Fuel Cells
Source: MDPI journal article supplement (doi:10.3390/bioengineering10020199), 2023-02-03

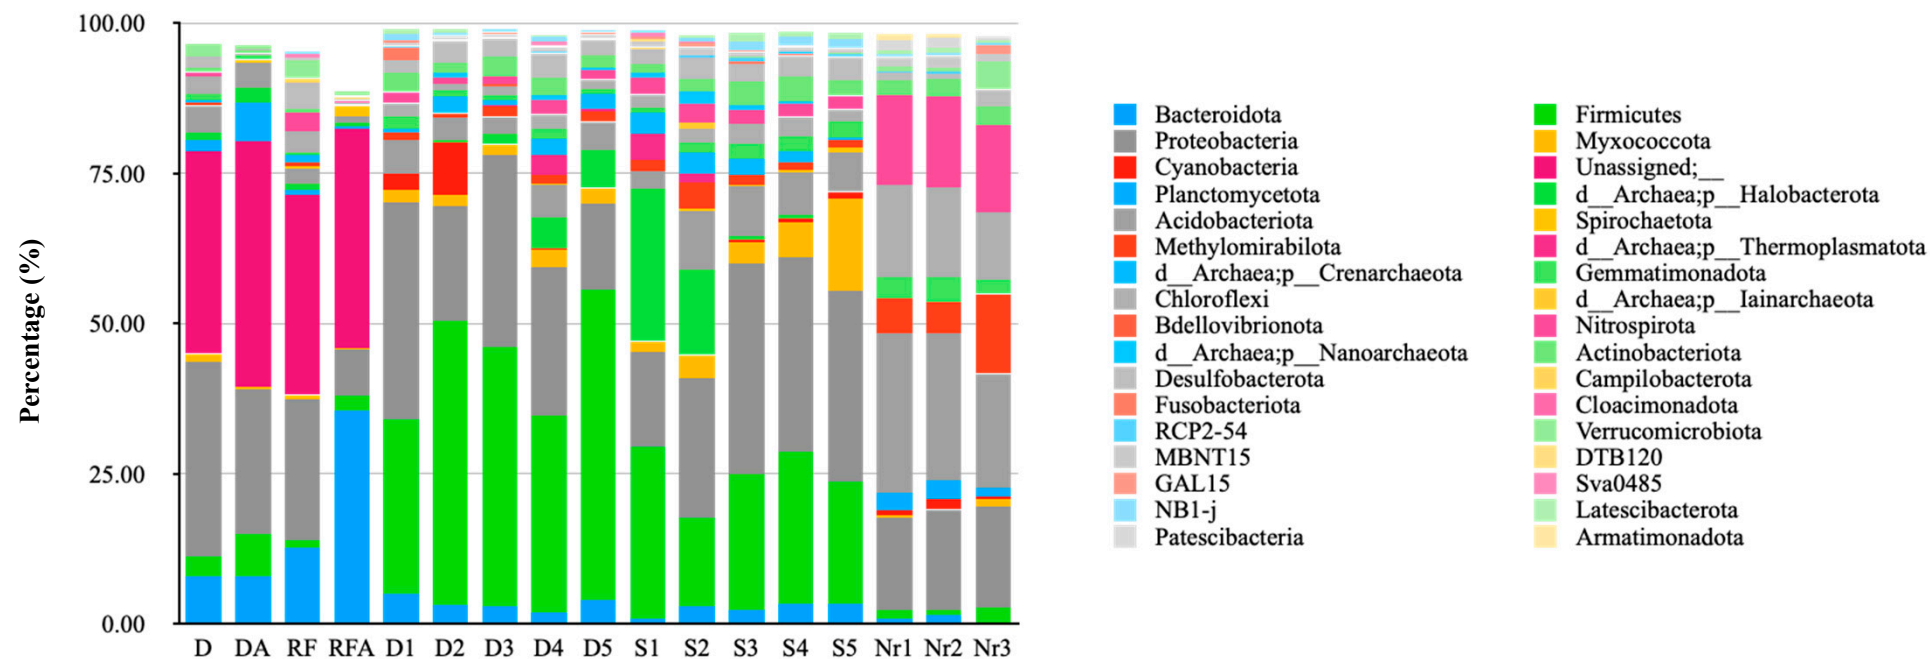

**Figure S1.** Relative abundance of phyla of the soil microbial communities.

Supplement: s1 [file s1]
